# Supplementary material for: Astrocytosis precedes amyloid plaque deposition in Alzheimer APPswe transgenic mouse brain: a correlative positron emission tomography and in vitro imaging study
Source: Springer Nature journal article supplement (doi:10.1007/s00259-015-3047-0), 2015-04-16
Supplement: MOESM1 [file 8219734]

## Supplementary Material for

**Astrocytosis precedes amyloid plaque deposition in Alzheimer APPswe transgenic mouse brain: a correlative positron emission tomography and *in vitro* imaging study**

**European Journal of Nuclear Medicine and Molecular Imaging**

Elena Rodriguez-Vieitez\*, Ruiqing Ni\*, Balázs Gulyás, Miklós Tóth, Jenny Häggkvist, Christer Halldin, Larysa Voytenko, Amelia Marutle, Agneta Nordberg

\*Contributed equally to this work.

**Correspondence** to Professor Agneta Nordberg

Karolinska Institutet, Division of Translational Alzheimer Neurobiology, Karolinska University Hospital Huddinge, Novum 5<sup>th</sup> Floor, Blickagången 6, S-141 57 Stockholm, Sweden.

Telephone: +46 8 585 85467

Fax: +46 8 585 85470

E-mail: [Agneta.K.Nordberg@ki.se](mailto:Agneta.K.Nordberg@ki.se)

**This PDF file includes:**

**Supplementary Fig. S1** Representative time-activity curves of <sup>11</sup>C-AZD2184 and <sup>11</sup>C-deuterium-L-deprenyl (<sup>11</sup>C-DED) radiotracers in APPswe and wild-type mice

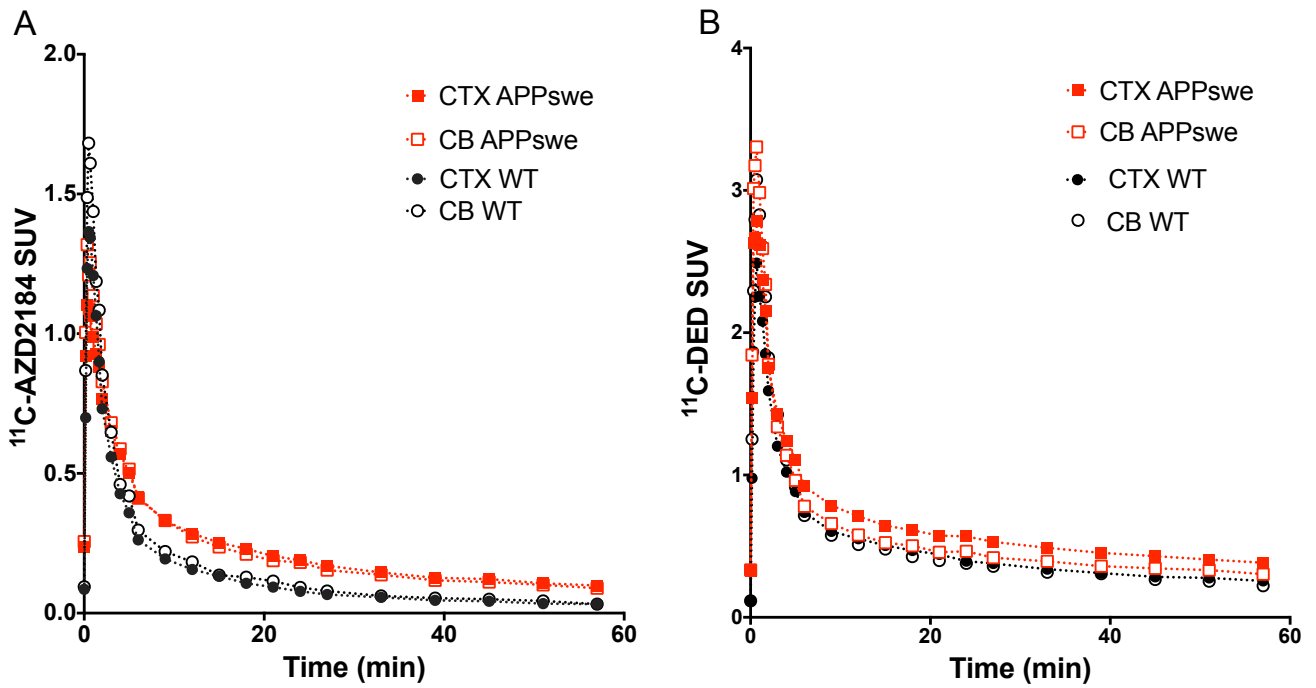

**Supplementary Fig. S1** Representative time-activity curves of  $^{11}\text{C-AZD2184}$  and  $^{11}\text{C-deuterium-L-deprenyl}$  ( $^{11}\text{C-DED}$ ) radiotracers in APPsw and wild-type mice. **A)** Time-activity curves of  $^{11}\text{C-AZD2184}$  in 20-month APPsw and age-matched wild-type mice. **B)** Time-activity curves of  $^{11}\text{C-DED}$  in 6-month APPsw and 8-month wild-type mice. CTX = cortex; CB = cerebellum; WT = wild-type; SUV = standard uptake value
